# Supplementary material
Source: PubMed Central journal article supplement (PMC3035086)
Supplement: supp_138.5.811_DEV061416TableS2.pdf [file supp_138.5.811_DEV061416TableS2.pdf]

Table S2. Genomic coordinates of the DMRs (NCBI37/UCSC mm9)

| DMR/gene                          | Chr. | Gametes    |            | Blastocyst |           | 12.5 dpc embryos |           |
|-----------------------------------|------|------------|------------|------------|-----------|------------------|-----------|
|                                   |      | Start      | End        | Start      | End       | Start            | End       |
| <b>Maternally methylated DMRs</b> |      |            |            |            |           |                  |           |
| <i>Nespas-Gnasxl</i>              | 2    | 174119863  | 174126564  | –          | –         | 174118500        | 174126564 |
| <i>Gnas 1A</i>                    | 2    | 174150877  | 174154638  | –          | –         | 174152576        | 174154868 |
| <i>Peg10</i>                      | 6    | 4696743    | 4699483    | 4696870    | 4699481   | 4695330          | 4699483   |
| <i>Mest</i>                       | 6    | 30684932   | 30689966*  | –          | –         | 30684007         | 30689966* |
| <i>Peg3</i>                       | 7    | 6679787    | 6684257    | –          | –         | 6680019          | 6685400   |
| <i>Snrpn</i>                      | 7    | 67147381   | 67151583   | 67147381   | 67151583* | 67148447         | 67152351  |
| <i>Kcnq1ot1</i>                   | 7    | 150480736  | 150482810  | –          | –         | 150479567        | 150482810 |
| <i>Zac1</i>                       | 10   | 12809697   | 12812131   | –          | –         | 12809759         | 12811804  |
| <i>Grb10</i>                      | 11   | 11925127   | 11927100   | –          | –         | 11925579         | 11927100  |
| <i>U2af1-rs1</i>                  | 11   | 22871610   | 22874212   | –          | –         | 22871765         | 22874253  |
| <i>Igf2r</i>                      | 17   | 12934169   | 12935816   | –          | –         | 12934169         | 12935733  |
| <i>Impact</i>                     | 18   | 13130435   | 13133510   | 13130748   | 13133258  | 13130575         | 13133135  |
| <b>Paternally methylated DMRs</b> |      |            |            |            |           |                  |           |
| <i>H19</i>                        | 7    | 149764673  | 149771930* | 149765988* | 149768424 | 149763126*       | 149768106 |
| <i>Rasgrf1</i>                    | 9    | 89767090*  | 89775128*  | –          | –         | 89771586         | 89781405  |
| <i>Dlk1-Gtl2</i>                  | 12   | 110762703* | 110773093* | 110765274* | 110765627 | 110765707        | 110769060 |

\*Precise endpoint not determined (information based on the tentative endpoints).
