# Supplementary material
Source: PubMed Central journal article supplement (PMC3035086)

# Tomizawa\_FigS1

**A**

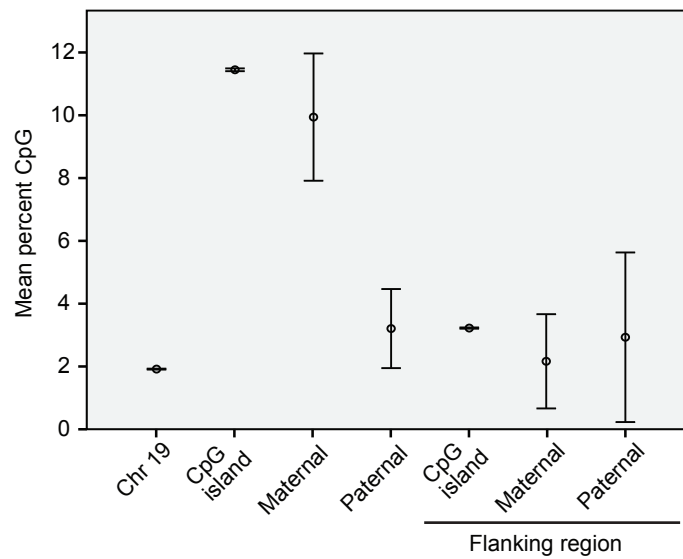

**B**

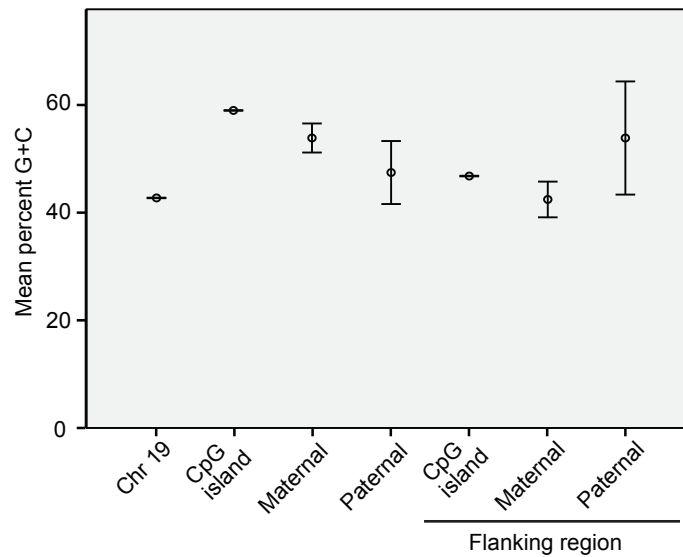

Supplement: supp_138.5.811_DEV061416FigS1.pdf [file supp_138.5.811_DEV061416FigS1.pdf]
